# Supplementary material
Source: publisher site journal article supplement (https://www.dovepress.com/article/348694)
Supplement: Supplementary file 1 [file get_supplementary_file.php]

Supplementary Table1. The candidate variables screening associated with renal sinus invasion via RFC algorithm.

| <b>Variables</b>       | <b>Mean Decrease Accuracy</b> | <b>Mean Decrease Gini</b> |
|------------------------|-------------------------------|---------------------------|
| Sex                    | -4.03E-36                     | 2.46E-15                  |
| PNI                    | 15.59108591                   | 6.575154427               |
| Smoking                | -2.46E-36                     | 2.19E-15                  |
| BMI                    | 8.13E-21                      | 0.002180416               |
| Comorbidities          | -1.000500375                  | 1.78E-15                  |
| Surgical way           | 1.50E-38                      | 3.82E-19                  |
| Nephrectomy            | 2.058179544                   | 0.011247353               |
| ASA                    | -2.00E-35                     | 4.74E-16                  |
| Fuhrman classification | 1.890697592                   | 1.18E-15                  |
| R.E.N.A.L              | 7.782349344                   | 0.269350385               |
| Tumorsize              | 14.16989496                   | 2.72072358                |
| Grade                  | 2.50E-38                      | 1.33E-18                  |
| NLR                    | 10.20673762                   | 1.281174248               |
| PLR                    | 6.808602193                   | 0.565325401               |
| NAR                    | 43.12909604                   | 32.97002297               |
| Age                    | 5.611980175                   | 0.270592205               |
| NARFIB                 | 20.56831778                   | 11.94172685               |
| HALP                   | 25.13898653                   | 18.63956239               |
| Fibrinogen             | 4.454360834                   | 0.89325783                |
| AGR                    | 4.890420217                   | 0.103893401               |
| AKI                    | 14.58122407                   | 3.699974022               |

Abbreviations. ASA: American Society of Anesthesia. NARFIB: neutrophil-to-albumin ratio(NAR) and fibrinogen(FIB) concentration. R.E.N.A.L: nephrometry score consists of [R]adius [tumor size as maximal diameter], [E]xophytic/endophytic properties of the tumor, [N]earness of tumor deepest portion to the collecting system or sinus, [A]nterior [a]/posterior [p] descriptor and the [L]ocation relative to the polar line. NLR: neutrophil to lymphocyte ratio. PLR: platelet to lymphocyte ratio. NAR: neutrophil to albumin ratio. PNI: prognostic nutrition index. HALP: hemoglobin level \* albumin level \* lymphocyte count / platelet count ratio. AGR: albumin to globulin ratio. AKI: body mass index\*serum albumin/neutrophil-lymphocyte ratio.

Supplementary Table2. The ROC curve analyses for predicting renal sinus invasion in each ML-based model.

| <b>Model</b>   | <b>AUC</b>  |              | <b>No.of candidate variables</b> |
|----------------|-------------|--------------|----------------------------------|
|                | <b>Mean</b> | <b>95%CI</b> |                                  |
| <b>RFC</b>     | 0.924       | 0.414-1.434  | 8                                |
| <b>SVM</b>     | 0.889       | 0.396-1.399  | 10                               |
| <b>DT</b>      | 0.887       | 0.379-1.395  | 6                                |
| <b>ANN</b>     | 0.832       | 0.307-1.357  | 11                               |
| <b>XGboost</b> | 0.797       | 0.264-1.330  | 9                                |

Abbreviations: RFC. Random Forest Classifier. SVM. Support Vector Machine. DT. Decision Tree. ANN. Artificial Neutral Network. XGboost. eXtreme Gradient boosting. AUC. Area Under Curve. 95%CI. 95% confidence interval.
